# Supplementary material
Source: PubMed Central journal article supplement (PMC1100782)

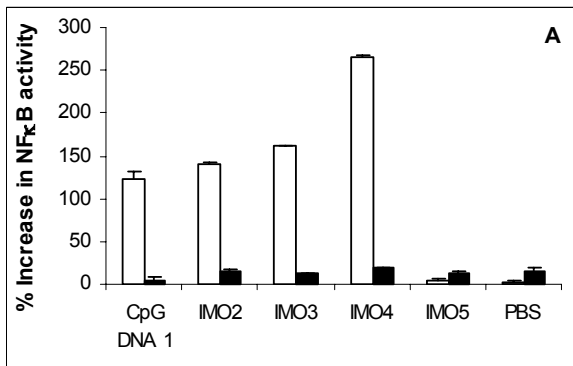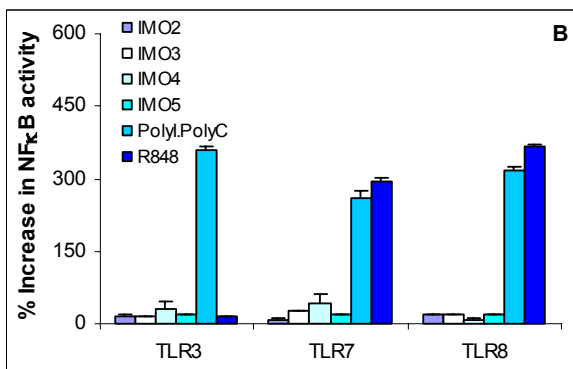

Supplement: pnas_102_19_6925__2.pdf [file pnas_102_19_6925__2.pdf]

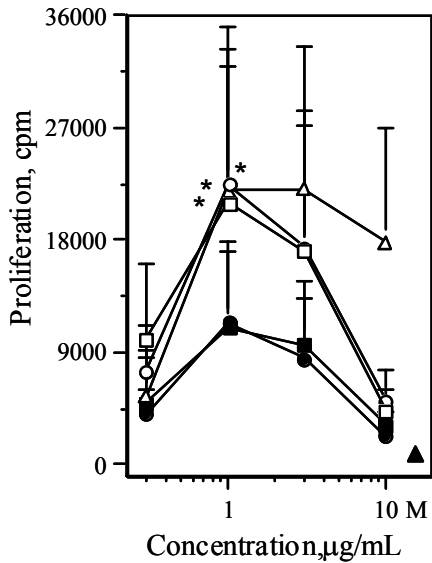

Supplement: pnas_102_19_6925__3.pdf [file pnas_102_19_6925__3.pdf]

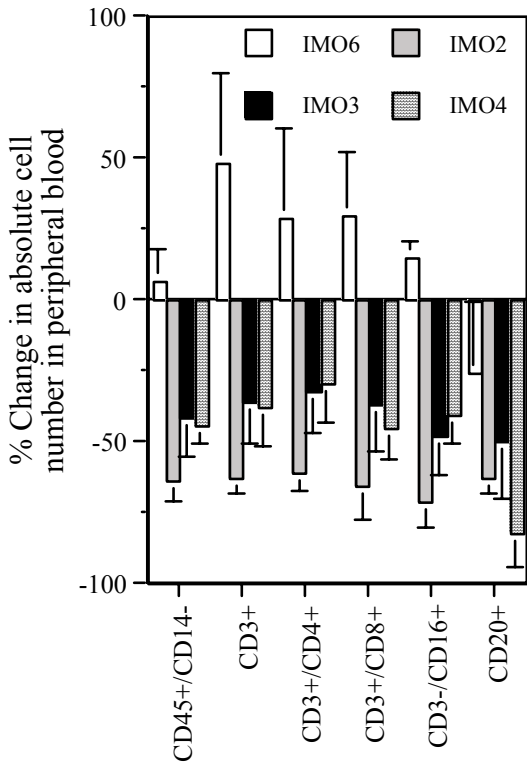

Supplement: pnas_102_19_6925__4.pdf [file pnas_102_19_6925__4.pdf]

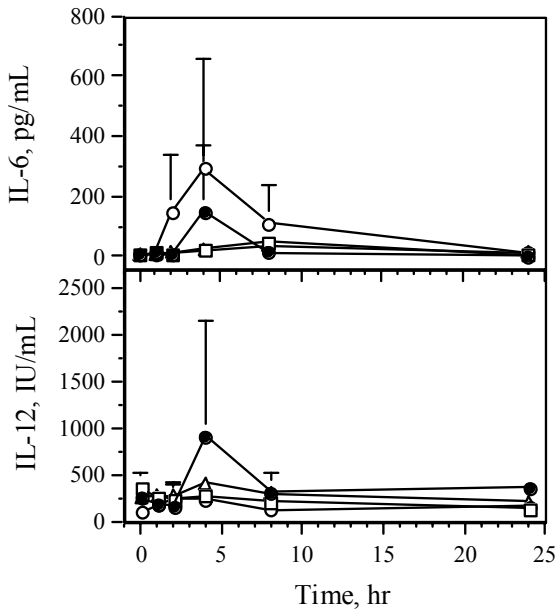

Supplement: pnas_102_19_6925__5.pdf [file pnas_102_19_6925__5.pdf]
